# Supplementary material for: Phases and correlations in active nematic granular systems
Source: Royal Society of Chemistry journal article supplement (doi:10.1039/d4sm00667d), 2024-01-01
Supplement: d4sm00667d8.pdf [file d4sm00667d8.pdf]

## 1 Supplementary Movies

- S1: This is a simulation movie for large rod length with  $\ell = 4.5$  mm,  $\phi = 0.45$  when system remains in isotropic state.
- S2: This is a simulation movie for  $\ell = 4.5$  mm,  $\phi = 0.75$  when system gets ordered along  $x$  direction.
- S3: This is a simulation movie for small rod length with  $\ell = 2.5$  mm,  $\phi = 0.60$  when system remains in isotropic state
- S4: This is a simulation movie for  $\ell = 2.5$  mm,  $\phi = 0.85$ .
- S5: This is a simulation movie for large rod length and high area fraction with  $\ell = 4.5$  mm,  $\phi = 0.85$  when the system forms is in the layered phase.
- S6: Trajectories of single rod at  $\phi = 0.65$  and  $\phi = 0.85$  for  $\ell = 2.5$  mm.
- S7: This is a simulation movie for  $\ell = 3.0$  mm,  $\phi = 0.85$ ; the motile defects are clearly visible.

## 2 Steady state configuration of $\ell = 3.5$ mm, $\phi = 0.85$

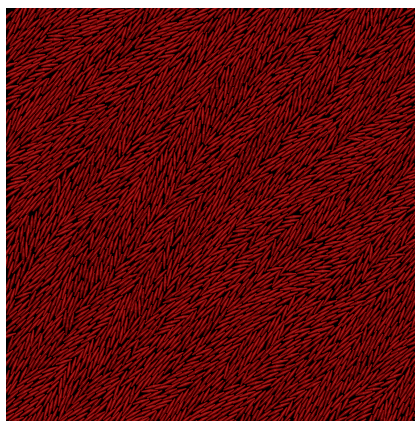

Figure 1: Steady state configuration of the rods for  $\ell = 3.5$  mm at  $\phi = 0.85$ ; rods are aligned in a direction other than  $x$  or  $y$  axes.

### 3 $G_2(\mathbf{r})$ vs $\mathbf{r}$ for different gap values in base and lid ( $w$ )

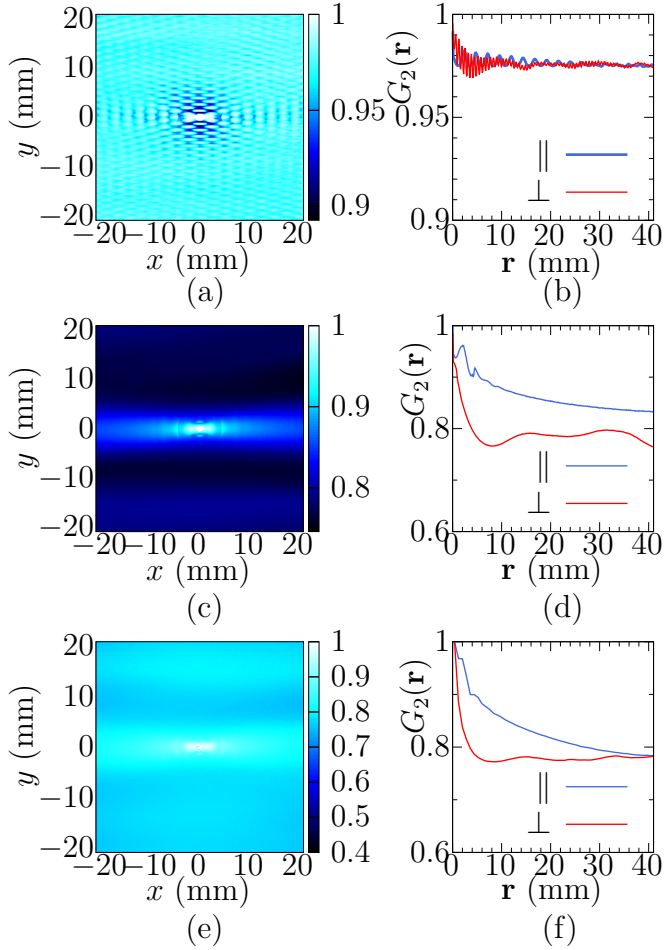

Figure 2: Nematic order parameter correlation function  $G_2(\mathbf{r})$  for  $\ell = 4.5$  mm,  $\phi = 0.80$  for different  $w$  values. (a) Heat map and (b)  $G_2(\mathbf{r})$  vs  $r$  parallel and perpendicular to alignment for  $w = 0.90$  mm. (c) Heat map and (d)  $G_2(\mathbf{r})$  vs  $r$  parallel and perpendicular to alignment for  $w = 1.4$  mm. (e) Heat map and (f)  $G_2(\mathbf{r})$  vs  $r$  along and normal to the alignment direction for  $w = 1.6$ .
